# Supplementary material for: EZH2–CCF–cGAS Axis Promotes Breast Cancer Metastasis
Source: MDPI journal article supplement (doi:10.3390/ijms23031788), 2022-02-04
Supplement: s1 [file s1]

## Supplementary

**Figure S1 CCF ratio is higher in MM-231 breast cancer cells**

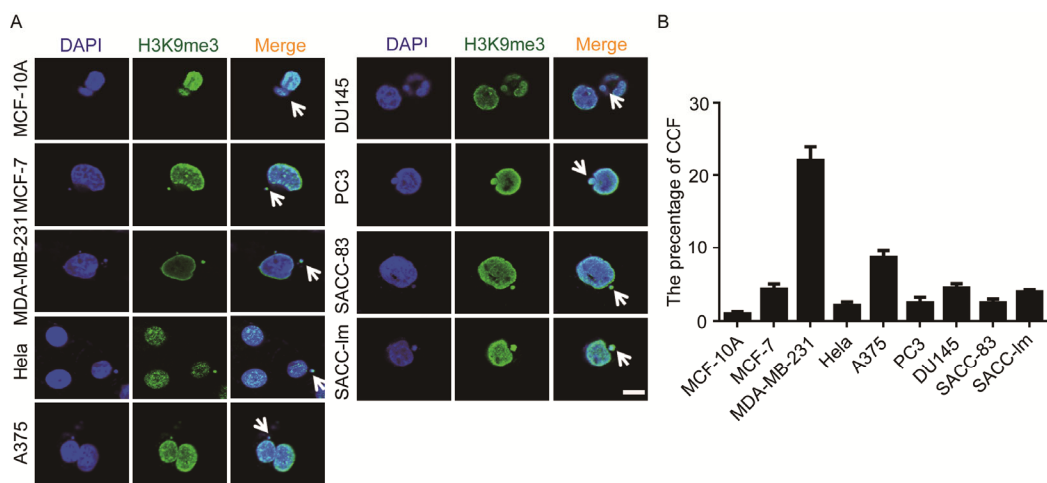

**S1 CCF exists in different tumor cells.** **A-B** MCF-10A, MCF-7, MM-231, HeLa, A375, DU145, PC3, SACC-83, SACC-lm cells were immunofluorescently stained with H3K9me3 to calculate the ratio of CCF, the arrow indicates CCF, Scalebars=10 $\mu$ m. Each experiment was repeated at least 3 times. Error bars, mean  $\pm$  SD, \*\*,  $P < 0.01$ ; \*\*\*,  $P < 0.001$ .

**Figure S2 EZH2 affects CCF formation in breast cancer cells.**

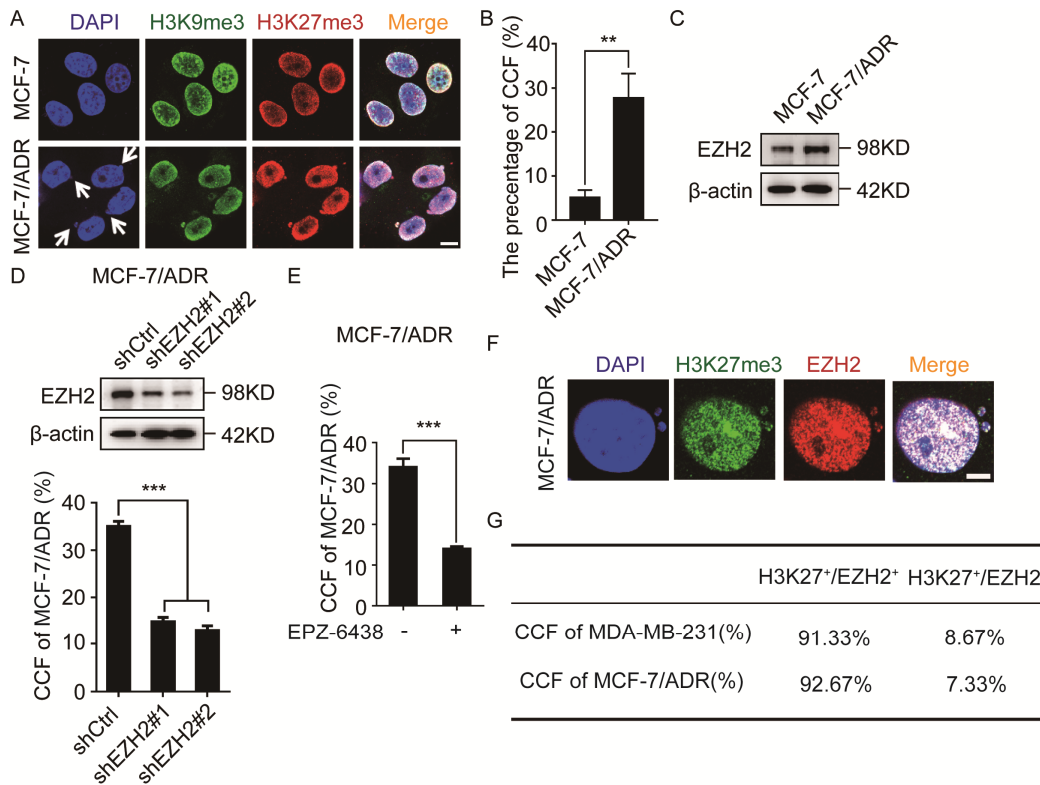

**A-B** MCF-7, MCF-7/ADR cells were immunofluorescently stained with H3K9me3 and H3K27me3 to calculate the ratio of CCF. CCF were indicated by arrows. Scale bars=10  $\mu$ m. Western blotting was used to detect the EZH2 level in MCF-7, MCF-7/ADR (**C**), MCF-7/ADR-shCtrl/MCF-7/ADR-shEZH2 cells (**D**). The ratio of CCF was calculated by immunofluorescence in MCF-7/ADR-shCtrl/MCF-7/ADR-shEZH2 cells (**D**), MCF-7/ADR cells treated with EPZ-6438 (3  $\mu$ M) for 72 h (**E**). **F** EZH2, H3K27me3 were immunofluorescently stained in MCF-7/ADR cells to observe the co-localization of EZH2 with CCF. **G** The ratio of H3K27me3<sup>+</sup>/EZH2<sup>+</sup> and H3K27me3<sup>+</sup>/EZH2<sup>-</sup> cells in the CCF of MM-231 and MCF-7/ADR cells were calculated respectively. Scale bars=5  $\mu$ m. Each experiment was repeated at least 3 times. Error bars, mean  $\pm$  SD, \*\*,  $P < 0.01$ ; \*\*\*,  $P < 0.001$ .

**Figure S3 EZH2 affects cGAS-STING pathway activation in breast cancer cells.**

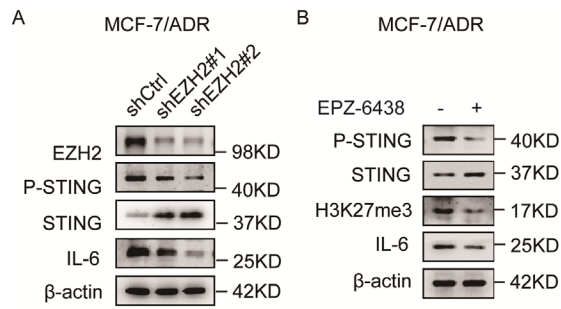

Western blotting was used to detect the P-STING, STING and IL-6 level in MCF-7/ADR-shCtrl/MCF-7/ADR-shEZH2 (A), MM-231 cells treated with EPZ-6438 (3  $\mu$ M) for 72 h (B).

**Figure S4 HMGA1 is a marker of CCF in breast cancer cells.**

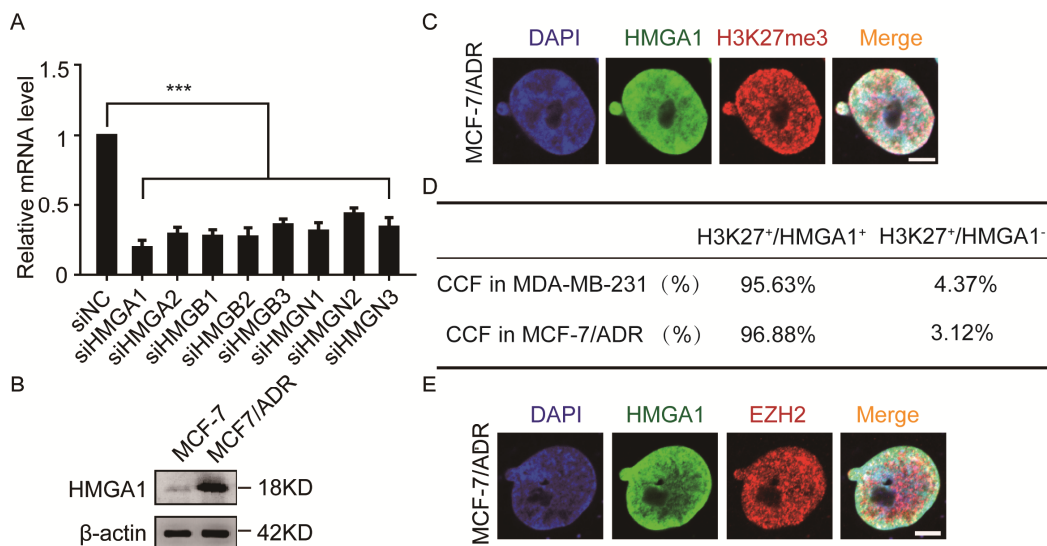

**A** siRNA is used to knock down HMG family proteins in MM-231 cells, and q-PCR is used to detect interference efficiency. **B** Western blotting was used to detect the HMGA1 level in MCF-7/ADR cells. **C** MCF-7/ADR cells were immunofluorescently stained with HMGA1 and H3K27me3 to observe the co-localization of HMGA1 and CCF, Scalebars=5  $\mu$ m. **D** The ratio of H3K27me3<sup>+</sup>/HMGA1<sup>+</sup> and H3K27me3<sup>+</sup>/HMGA1<sup>-</sup> cells in the CCF of MM-231 and MCF-7/ADR cells were calculated respectively, Scalebars=5  $\mu$ m. **E** MCF-7/ADR cells were immunofluorescently stained with HMGA1 and EZH2 to observe the co-localization of HMGA1 and EZH2, Scalebars=5  $\mu$ m. Each experiment was repeated at least 3 times. Error bars, mean  $\pm$  SD, \*\*,  $P < 0.01$ ; \*\*\*,  $P < 0.001$ .

**Figure S5 EZH2 promotes breast cancer migration through CCF.**

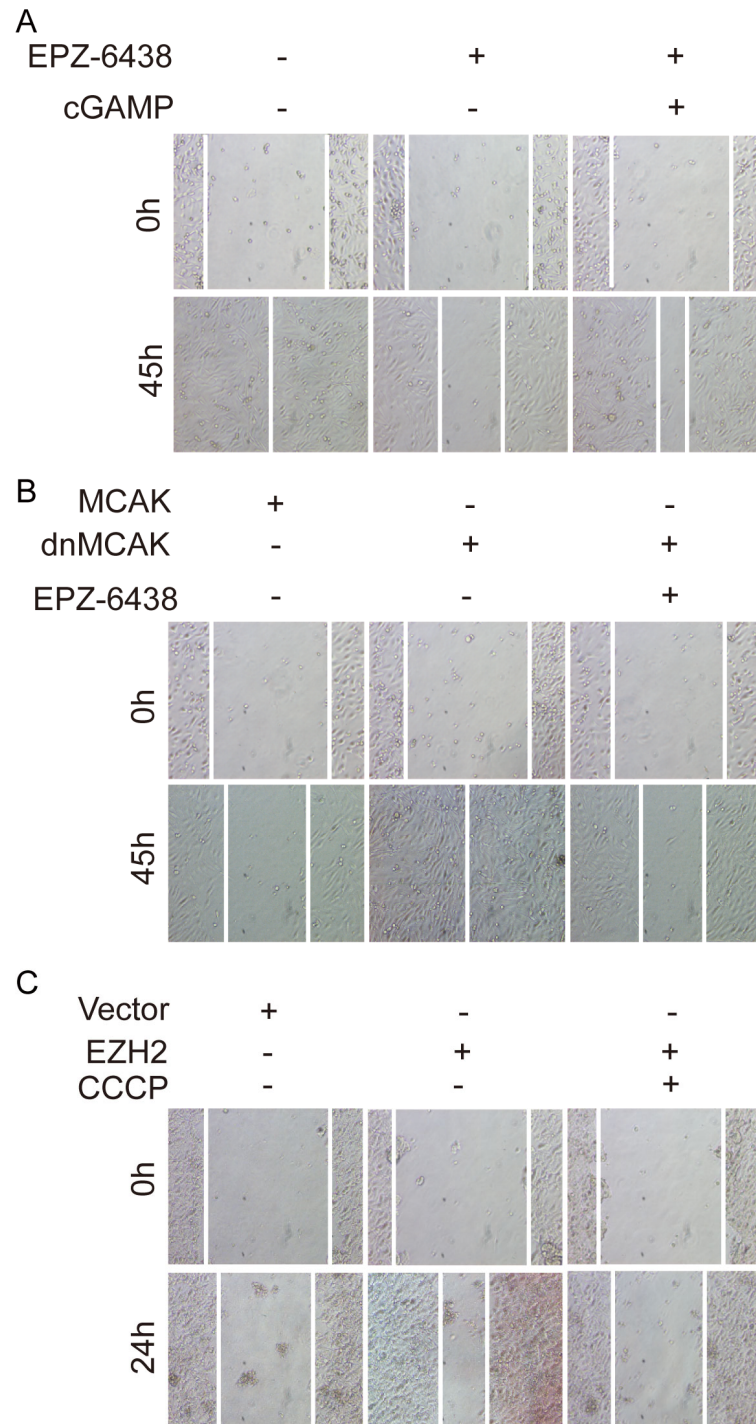

Wound-healing assay of MM-231 cells were treated with EPZ-6438 and cGAMP **(A)**, MM-231-dnMCAK cells treatment with EPZ-6438 **(B)**, MCF-7-EZH2 cells treatment with CCCP **(C)**.
