# Supplementary material for: EZH2–CCF–cGAS Axis Promotes Breast Cancer Metastasis
Source: Int J Mol Sci. 2022 Feb 4;23(3):1788. doi: 10.3390/ijms23031788 (PMC8836657; doi:10.3390/ijms23031788)
Supplement: Supplementary file 1 [file ijms-23-01788-s001.zip]

Archive with 4 entries (4 files):
- Supplementary Table S1.xlsx
- Supplementary Table S2.xlsx
- Supplementary Table S3.xlsx
- Supplementary.pdf
