# Supplementary material for: EZH2–CCF–cGAS Axis Promotes Breast Cancer Metastasis
Source: Int J Mol Sci. 2022 Feb 4;23(3):1788. doi: 10.3390/ijms23031788 (PMC8836657; doi:10.3390/ijms23031788)
Supplement: Supplementary file 1 [file ijms-23-01788-s001.zip › Supplementary Table S1.xlsx]

## Sheet: Sheet1
Supplementary Table S1. Primer sequence
cGAS-sense	5’- ATGCAGCCTTGGCACG -3’
GAS-antisense	5’-TCAAAATTCATCAAAAACTG -3’
MCAK-sense	5'- ATGGCCATGGACTCGTCG -3'
MCAK-antisense	5'- TCACTGGGGCCGTTTCTT -3'
dnMCAK-sense	5'- ATGGCCATGGACTCGTCG -3'
dnMCAK-antisense	5'-TCATTGTCTGCTAGCCTGCTCTT-3'
EZH2-sense	5'- ATGGGCCAGACTGGGAAGAA -3'
EZH2-antisense	5'-TCAAGGGATTTCCATTTCTCT-3'
shEZH2#1	GCTAGGTTAATTGGGACCAAA
shEZH2#2	CCCAACATAGATGGACCAAAT
siHMGA1	CAACTCCAGGAAGGAAACCAA
siHMGA2	GCCACAACAAGTTGTTCAGAA
siHMGB1	CTGCGAAGCTGAAGGAAAA
siHMGB2	GCAGCTAAGCTAAAGGAGAAA
siHMGB3	TGAGAAGGATGTTGCTGACTATA
siHMGN1	GAAGGATAAATCTTCAGACAA
siHMGN2	AGGACGAACCACAGAGAAGAT
siHMGN3	AGAACCTGGAGCAAAGATTAG
