# Supplementary material for: EZH2–CCF–cGAS Axis Promotes Breast Cancer Metastasis
Source: Int J Mol Sci. 2022 Feb 4;23(3):1788. doi: 10.3390/ijms23031788 (PMC8836657; doi:10.3390/ijms23031788)
Supplement: Supplementary file 1 [file ijms-23-01788-s001.zip › Supplementary Table S2.xlsx]

## Sheet: Sheet1
Supplementary Table S2. Real-time PCR primer sequence
actin-sense	5’-TCGTGCGTGACATTAAGGAG-3’
actin-anti-sense	5’-ATGCCAGGGTACATGGTGGT-3’
HMGA1-sense	5'- CAACTCCAGGAAGGAAACCA-3'
HMGA1-anti-sense	5'-AGGACTCCTGCGAGATGC-3'
HMGA2-sense	5'-ACCCAGGGGAAGACCCAAA-3'
HMGA2-anti-sense	5'-CCTCTTGGCCGTTTTTCTCCA-3'
HMGB1-sense	5'-ATATGGCAAAAGCGGACAAG-3'
HMGB1-anti-sense	5'-GCAACATCACCAATGGACAG-3'
HMGB2-sense	5'-CTCCCAAAGGTGATAAGAAG-3'
HMGB2-anti-sense	5'-AACAGGAAGAAGGCAGAT-3'
HMGB3-sense	5'-GGATGTTGCTGACTATAAG-3'
HMGB3-anti-sense	5'-TCTTCTTCATCTTCCTCTT-3'
HMGN1-sense	5'-AGCAGCGAAGGATAAATC-3'
HMGN1-anti-sense	5'-TTCTTTAGTTTCTTGGTTAGC-3'
HMGN2-sense	5'-TAAGGGAGATAAAGCAAAGGT -3'
HMGN2-anti-sense	5'-TTGGAGGAGCAGGTTTAG -3'
HMGN3-sense	5'-CCTGAACCCAAACCAAGA -3'
HMGN3-anti-sense	5'-CTTCCCTTTAGCACCTCTG -3'
