# Supplementary material for: EZH2–CCF–cGAS Axis Promotes Breast Cancer Metastasis
Source: Int J Mol Sci. 2022 Feb 4;23(3):1788. doi: 10.3390/ijms23031788 (PMC8836657; doi:10.3390/ijms23031788)
Supplement: Supplementary file 1 [file ijms-23-01788-s001.zip › Supplementary Table S3.xlsx]

## Sheet: Sheet1
Supplementary Table S3. List of experimental antibodies
cGAS	CST	79978
cGAS	Abcam	ab242363
cGAS	CST	15102
HMGA1	Abcam	ab168260
HMGA1	CST	7777
STING	Abways	CY7204
p-STING	CST	19781
β-actin	Sigma-Aldrich	A1978
EZH2	CST	3147
EZH2	Abways	Q15910
USP7	Abcam	ab108931
USP7	Abways	Q93009
IL-6	Immunoway	YT5348
H3K27me3	Activemotif	39535
H3K27me3	Millipore	07-449
MCAK	Abways	Q99661
Rb	CST	9309s
H3K9me3	Activemotif	39286
H3K9me3	Millipore	07-442
USP9X	Proteintech	55054-1-AP
FLAG	Abmart	M20008
Ubiquitin	CST	3933
HA	Sungene Biotech	KM8004
normal mouse IgG	Santa Cruz Biotechnology	SC-2025
normal rabbit IgG	CST	2729
the secondary antibodies used were goat anti-mouse and goat anti-rabbit	Zsgb-Bio	ZSGB-BIO
